## INDEX OF AUTHORS

- Abe, A. S.** *See* JOHANSEN, ABE and ANDRESEN
- Abe, Augusto S. and Johansen, Kjell.** Gas exchange and ventilatory responses to hypoxia and hypercapnia in *Amphisbaena alba* (Reptilia: Amphisbaenia) **127**, 159
- Abisgold, J. D. and Simpson, S. J.** The physiology of compensation by locusts for changes in dietary protein **129**, 329
- Achituv, Yair.** *See* SUSSWEIN, ACHITUV, CAPPELL and BENNETT
- Adams, Brett A.** Thermal dependence of passive electrical properties of lizard muscle fibres **133**, 169
- Agnisola, C.** *See* HOULIHAN, AGNISOLA, HAMILTON and TRARA GENOINO
- Aguayo, Albert J.** *See* BRAY, VILLEGAS-PÉREZ, VIDAL-SANZ and AGUAYO
- Ahearn, Gregory A. and Clay, Laurel P.** Membrane-potential-sensitive, Na<sup>+</sup>-independent lysine transport by lobster hepatopancreatic brush border membrane vesicles **127**, 373
- Na<sup>+</sup>-Cl<sup>-</sup>-glutamate cotransport by lobster hepatopancreatic brush border membrane vesicles **130**, 175
- Aldridge, H. D. J. N.** Turning flight of bats **128**, 419
- Body accelerations during the wingbeat in six bat species: the function of the upstroke in thrust generation **130**, 275
- Alerstam, Thomas.** Bird migration across a strong magnetic anomaly **130**, 63
- Al-Shukur, Marwan.** *See* NOBLE-NESBITT and AL-SHUKUR
- Anapol, F. C. and Jungers, W. L.** Telemetered electromyography of the fast and slow extensors of the leg of the brown lemur (*Lemur fulvus*) **130**, 341
- Anderson, A. E., Childress, J. J. and Favuzzi, J. A.** Net uptake of CO<sub>2</sub> driven by sulphide and thiosulphate oxidation in the bacterial symbiont-containing clam *Solemya reidi* **133**, 1
- Anderson, Peter A. V.** Properties and pharmacology of a TTX-insensitive Na<sup>+</sup> current in neurones of the jellyfish *Cyanea capillata* **133**, 231
- Anderson, Peter A. V. and McKay, M. Craig.** The electrophysiology of cnidocytes **133**, 215
- Andresen, J. H.** *See* JOHANSEN, ABE and ANDRESEN
- Arp, Alissa J., Childress, James J. and Vetter, Russell D.** The sulphide-binding protein in the blood of the vestimentiferan tube-worm, *Riftia pachyptila*, is the extracellular haemoglobin **128**, 139
- Ashford, M. L. J., Boden, P., Ramsey, R. L., Shinozaki, H. and Usherwood, P. N. R.** Effects of trimetaphan on locust muscle glutamate receptors **130**, 405
- Baier, H.** *See* LUTCAVAGE, LUTZ and BAIER
- Baird, Troy A.** *See* GRAHAM, BAIRD and STÖCKMANN
- Balaban, Pavel M.** *See* IERUSALIMSKY and BALABAN
- Balice-Gordon, R. J.** *See* THOMPSON, SOILEAU, BALICE-GORDON and SUTTON
- Ballantyne, James S. and Moyes, Christopher D.** The role of divalent cations and ionic strength in the osmotic sensitivity of glutamate oxidation in oyster gill mitochondria **130**, 203
- The effects of salinity acclimation on the osmotic properties of mitochondria from the gill of *Crassostrea virginica* **133**, 449
- Barber, Andrew.** Intracellular free potassium, sodium and chloride measured with ion-selective microelectrodes from salivary gland cells of the snail *Planorbis corneus* **128**, 349
- Barnhart, Christopher M. and McMahon, B. R.** Discontinuous carbon dioxide and metabolic depression in dormant land snails **128**, 123

- Baudinette, R. V., Gannon, B. J., Runciman, W. B., Wells, S. and Love, J. B.** Do cardiorespiratory variables show entrainment with hopping in tamar wallabies? **129**, 251
- Beadle, C. A.** See SHIMAHARA, PICHON, LEES, BEADLE and BEADLE
- Beadle, D. J.** See SHIMAHARA, PICHON, LEES, BEADLE and BEADLE
- Bennet-Clark, H. C.** The tuned singing burrow of mole crickets **128**, 383
- Bennett, A. F.** See ELSE and BENNETT
- Bennett, Michael V. L.** See SUSSWEIN, ACHITUV, CAPPELL and MITCHELL
- Berschick, P., Bridges, C. R. and Grieshaber, M. K.** The influence of hyperoxia, hypoxia and temperature on the respiratory physiology of the intertidal rockpool fish *Gobius cobitis* Pallas **130**, 369
- Bertram, J. E. A. and Gosline, J. M.** Functional design of horse hoof keratin: the modulation of mechanical properties through hydration effects **130**, 121
- Bévengut, M.** See FRASER, BÉVENGUT and CLARAC
- Björklund, Anders.** See DUNNETT and BJÖRKLUND
- Blagburn, Jonathan M. and Sattelle, David B.** Presynaptic depolarization mediates presynaptic inhibition at a synapse between an identified mechanosensory neurone and giant interneurone 3 in the first instar cockroach, *Periplaneta americana* **127**, 135
- Calcium conductance in an identified cholinergic synaptic terminal in the central nervous system of the cockroach **129**, 347
- Blickhan, Reinhard and Full, Robert J.** Locomotion energetics of the ghost crab. II. Mechanics of the centre of mass during walking and running **130**, 155
- Boden, P.** See ASHFORD, BODEN, RAMSEY, SHINOZAKI and USHERWOOD
- Bollenbacher, W. E., Granger, N. A., Katahira, E. J. and O'Brien, M. A.** Developmental endocrinology of larval moulting in the tobacco hornworm, *Manduca sexta* **128**, 175
- Bollenbacher, Walter E.** See WATSON, WILLIAMS and BOLLENBACHER
- Boutilier, R. G., Glass, M. L. and Heisler, N.** Blood gases, and extracellular/intracellular acid-base status as a function of temperature in the anuran amphibians *Xenopus laevis* and *Bufo marinus* **130**, 13
- Bradley, Timothy J.** See GARRETT and BRADLEY
- See also WRIGHT, SECOMB and BRADLEY
- Bray, Garth M., Villegas-Pérez, Maria Paz, Vidal-Sanz, Manuel and Aguayo, Albert J.** The use of peripheral nerve grafts to enhance neuronal survival, promote growth and permit terminal reconnections in the central nervous system of adult rats **132**, 5
- Brezden, Borys L.** See SIGURDSON, MORRIS, BREZDEN and GARDNER
- Bridges, C. R.** See BERSCHICK, BRIDGES and GRIESHABER
- See also MORRIS, BRIDGES and GRIESHABER
- Brittain, T.** A possible role for protein dissociation in the functioning of embryonic haemoglobins **127**, 443
- Brockes, Jeremy P.** The nerve dependence of amphibian limb regeneration **132**, 79
- Brown, J. Anne and Green, Carol.** Single nephron function of the lesser spotted dogfish, *Scyliorhinus canicula*, and the effects of adrenaline **129**, 265
- Bunge, Richard B.** Tissue culture observations relevant to the study of axon-Schwann cell interactions during peripheral nerve development and repair **132**, 21
- Burggren, Warren W.** See MCMAHON and BURGGREN
- Burkhardt, James.** See YEE, BURKHARDT and GILLY
- Bush, Brian M. H.** See SILLAR, CLARAC and BUSH
- Cameron, James N. and Iwama, George K.** Compensation of progressive hypercapnia in channel catfish and blue crabs **133**, 183
- Canty, Andrea A. and Driedzic, William R.** Evidence that myoglobin does not support heart performance at maximal levels of oxygen demand **128**, 469
- Cappell, Mitchell S.** See SUSSWEIN, ACHITUV, CAPPELL and BENNETT
- Carlsen, R. C.** See CURRIE and CARLSEN

- Casey, Timothy M. and Hegel-Little, Jeri R.** Instantaneous oxygen consumption and muscle stroke work in *Malacosoma americanum* during pre-flight warm-up 127, 389
- Childress, J. J.** See ANDERSON, CHILDRESS and FAVUZZI
- Childress, James J.** See ARP, CHILDRESS and VETTER
- Chiquet, Matthias and Nicholls, John G.** Neurite outgrowth and synapse formation by identified leech neurones in culture 132, 191
- Clarac, F.** See FRASER, BÉVENGUT and CLARAC
- Clarac, F., Libersat, F., Pflüger, H. J. and Rathmayer, W.** Motor pattern analysis in the shore crab (*Carcinus maenas*) walking freely in water and on land 133, 395
- Clarac, François.** See SILLAR, CLARAC and BUSH
- Clay, Laurel P.** See AHEARN and CLAY
- Coles, Roger B., Konishi, Masakazu and Pettigrew, John D.** Hearing and echolocation in the Australian grey swiftlet, *Collocalia spodiopygia* 129, 365
- Colmers, W.** See GOLDBERG, COLMERS, EDSTROM and LUKOWIAK
- Currie, S. N. and Carlsen, R. C.** Modulated vibration-sensitivity of lamprey Mauthner neurones 129, 41  
—Functional significance and neural basis of larval lamprey startle behaviour 133, 121
- Delcomyn, Fred.** Motor activity during searching and walking movements of cockroach legs 133, 111
- Dickinson, Michael H.** See LENT and DICKINSON
- Djamgoz, M. B. A.** See HENDY and DJAMGOZ
- Dobson, G. P. and Hochachka, P. W.** Role of glycolysis in adenylate depletion and repletion during work and recovery in teleost white muscle 129, 125
- Doherty, John A. and Pires, Anthony.** A new microcomputer-based method for measuring walking phonotaxis in field crickets (Gryllidae) 130, 425
- Dormann, Ada.** See SPIRA, ZELDES, HOCHNER and DORMANN
- Driedzic, William R.** See CANTY and DRIEDZIC
- Dumont, J. P. C. and Wine, J. J.** The telson flexor neuromuscular system of the crayfish. I. Homology with the fast flexor system 127, 249  
—The telson flexor neuromuscular system of the crayfish. II. Segment-specific differences in connectivity between premotor neurones and the motor giants 127, 279  
—The telson flexor neuromuscular system of the crayfish. III. The role of feedforward inhibition in shaping a stereotyped behaviour pattern 127, 295
- Dunnett, Stephen B. and Björklund, Anders.** Mechanisms of function of neural grafts in the adult mammalian brain 132, 265
- Duthie, G. G.** See WELLS, DUTHIE, HOULIHAN, SMITH and WELLS
- Duthie, Garry G. and Hughes, George M.** The effects of reduced gill area and hyperoxia on the oxygen consumption and swimming speed of rainbow trout 127, 349
- Dyer, Fred C. and Seeley, Thomas D.** Interspecific comparisons of endothermy in honey-bees (*Apis*): deviations from the expected size-related patterns 127, 1
- Edgecomb, Robert S.** See SUDLOW, EDGECOMB and MURDOCK
- Edgecomb, Robert S., Murdock, Larry L., Smith, André B. and Stephen, Margaret D.** Regulation of tarsal taste threshold in the blowfly, *Phormia regina* 127, 79
- Edstrom, J.** See GOLDBERG, COLMERS, EDSTROM and LUKOWIAK
- El Haj, A. J. and Houlihan, D. F.** *In vitro* and *in vivo* protein synthesis rates in a crustacean muscle during the moult cycle 127, 413
- Ellory, J. C.** See GIBSON and ELLORY  
—See also GIBSON, ELLORY and LAHLOU
- Ellory, J. C., Wolowyk, M. W. and Young, J. D.** Hagfish (*Eptatretus stouti*) erythrocytes show minimal chloride transport activity 129, 377
- Else, P. L. and Bennett, A. F.** The thermal dependence of locomotor performance and muscle contractile function in the salamander *Ambystoma tigrinum nebulosum* 128, 219

- Elson, Robert C.** Integration of wing proprioceptive and descending exteroceptive sensory inputs by thoracic interneurons of the locust **128**, 193
- Ennos, A. Roland.** A comparative study of the flight mechanism of Diptera **127**, 355
- Evans, Peter D.** Phenyliminoimidazolidine derivatives activate both OCTOPAMINE<sub>1</sub> and OCTOPAMINE<sub>2</sub> receptor subtypes in locust skeletal muscle **129**, 239
- Farbridge, K. J. and Leatherland, J. F.** Lunar cycles of coho salmon, *Oncorhynchus kisutch*. I. Growth and feeding **129**, 165  
—Lunar cycles of coho salmon, *Oncorhynchus kisutch*. II. Scale amino acid uptake, nucleic acids, metabolic reserves and plasma thyroid hormones **129**, 179
- Farrell, A. P.** Coronary flow in a perfused rainbow trout heart **129**, 107
- Favuzzi, J. A.** See ANDERSON, CHILDRESS and FAVUZZI
- Febry, Ricardo and Lutz, Peter.** Energy partitioning in fish: the activity-related cost of osmoregulation in a euryhaline cichlid **128**, 63
- Feldkamp, Steven D.** Swimming in the California sea lion: morphometrics, drag and energetics **131**, 117
- ffrench-Constant, Charles.** See RAFF, FFRENCH-CONSTANT and MILLER
- Frain, W. J.** The effect of external sodium and potassium concentrations on sodium fluxes by salt-depleted and non-depleted minnows, *Phoxinus phoxinus* (L.) **131**, 417
- Fraser, K.** See HEITLER and FRASER
- Fraser, P. J., Bévengut, M. and Clarac, F.** Swimming patterns and the activity of identified equilibrium interneurons in the shore crab, *Carcinus maenas* **130**, 305
- Full, Robert J.** Locomotion energetics of the ghost crab. I. Metabolic cost and endurance **130**, 137  
—See also BLICKHAN and FULL
- Furilla, R. A. and Jones, David R.** The relationship between dive and pre-dive heart rates in restrained and free dives by diving ducks **127**, 333
- Furukawa, Yasuo and Kobayashi, Makoto.** Neural control of the heart beat in the African giant snail, *Achatina fulica* Férussac. I. Identification of the heart regulatory neurones **129**, 279  
—Neural control of the heart beat in the African giant snail, *Achatina fulica* Férussac. II. Interconnections among the heart regulatory neurones **129**, 295
- Gabbott, Geoffrey R. J. and Jones, David R.** Habituation of the cardiac response to involuntary diving in diving and dabbling ducks **131**, 403
- Gaertner M.** See LUEKEN, KRÜPPEL and GAERTNER
- Gannon, B. J.** See BAUDINETTE, GANNON, RUNCIMAN, WELLS and LOVE
- Gardner, David R.** See SIGURDSON, MORRIS, BREZDEN and GARDNER
- Garrett, Margaret A. and Bradley, Timothy J.** Extracellular accumulation of proline, serine and trehalose in the haemolymph of osmoconforming brackish-water mosquitoes **129**, 231
- Gibson, J. S. and Ellory, J. C.** Intestinal salt absorption in the stenothermic Antarctic fish, *Notothenia rossii* **130**, 437
- Gibson, J. S., Ellory, J. C. and Lahlou, B.** Salinity acclimation and intestinal salt transport in the flounder: the role of the basolateral cell membrane **128**, 371
- Gilly, W. F.** See YEE, BURKHARDT and GILLY
- Glass, M. L.** See BOUTILIER, GLASS and HEISLER
- Goldberg, J., Colmers, W., Edstrom, J. and Lukowiak, K.** Suppression of sensory to motor synaptic transmission and narrowing of the sensory neurone action potential by arginine vasotocin in *Aplysia californica* **128**, 47
- Gosline, J. M.** See BERTRAM and GOSLINE
- Gosline, John M.** See SHADWICK, GOSLINE and MILSOM
- Götz, Karl G.** Course-control, metabolism and wing interference during ultralong tethered flight in *Drosophila melanogaster* **128**, 35
- Graff, D.** See MCFARLANE, GRAFF and GRIMMELIKHUIJZEN
- Graham, Jeffrey B., Baird, Troy A. and Stöckmann, Wieland.** The transition to air breathing in fishes. IV. Impact of branchial specializations for air breathing on the aquatic respiratory mechanisms and ventilatory costs of the swamp eel *Synbranchus marmoratus* **129**, 83

- Graham, Jeffrey B., Lowell, William R., Rubinoff, Ira and Motta, Jorge.** Surface and subsurface swimming of the sea snake *Pelamis platurus* 127, 27
- Granger, N. A.** See BOLLENBACHER, GRANGER, KATAHIRA and O'BRIEN
- Green, Carol.** See BROWN and GREEN
- Greenberg, M. J.** See LEHMAN and GREENBERG
- Grieshaber, M. K.** See BERSCHICK, BRIDGES and GRIESHABER  
—See also MORRIS, BRIDGES and GRIESHABER
- Grimmelikhuijzen, C. J. P.** See MCFARLANE, GRAFF and GRIMMELIKHUIJZEN
- Hadley, Neil F.** See TOOLSON and HADLEY
- Hainsworth, F. Reed.** Precision and dynamics of positioning by Canada geese flying in formation 128, 445
- Hamilton, N. M.** See HOULIHAN, AGNISOLA, HAMILTON and TRARA GENOINO
- Harrison, Jon M.** Roles of individual honeybee workers and drones in colonial thermogenesis 129, 53
- Hazel, Jeffrey R.** See SIDELL and JEFFREY
- Hazelton, Shelia R.** See SPRING and HAZELTON
- Hegel-Little, Jeri R.** See CASEY and HEGEL-LITTLE
- Heinrich, Bernd.** Thermoregulation by winter-flying endothermic moths 127, 313  
—See also MORGAN and HEINRICH 133, 59
- Heisler, N.** See BOUTILIER, GLASS and HEISLER  
—See also HICKS, ISHIMATSU and HEISLER
- Heitler, W. J. and Fraser, K.** Interactions of the giant fibres and motor giant neurones of the hermit crab 133, 353
- Hendy, C. H. and Djamgoz, M. B. A.** Potassium activity measurements in the micro-environment of the central nervous system of an insect 127, 211
- Henry, Raymond P.** See WHEATLY and HENRY
- Hertel, Horst and Maronde, Ulrike.** The physiology and morphology of centrally projecting visual interneurons in the honeybee brain 133, 301
- Hertel, Horst, Schäfer, Sabine and Maronde, Ulrike.** The physiology and morphology of visual commissures in the honeybee brain 133, 283
- Hetherington, Thomas E.** Physiological features of the opercularis muscle and their effects on vibration sensitivity in the bullfrog *Rana catesbeiana* 131, 189
- Heumann, Rolf.** Regulation of the synthesis of nerve growth factor 132, 133
- Hicks, James W., Ishimatsu, Atsushi and Heisler, Norbert.** Oxygen and carbon dioxide transport characteristics of the blood of the Nile monitor lizard (*Varanus niloticus*) 130, 27
- Hill, R. B.** See SMITH and HILL
- Hill, Robert B.** Correlation of electrical and mechanical activity of holothurian muscle 130, 331
- Höbe, Helve.** Sulphate entry into soft-water fish (*Salmo gairdneri*, *Catostomus commersoni*) during low ambient pH exposure 133, 87
- Hochachka, P. W.** See DOBSON and HOCHACHKA
- Hochner, Binyamin.** See SPIRA, ZELDES, HOCHNER and DORMANN
- Hopkins, Carl D.** See SCHLUGER and HOPKINS
- Houlihan, D. F.** See EL HAJ and HOULIHAN  
—See also WELLS, DUTHIE, HOULIHAN, SMITH and WELLS
- Houlihan, D. F., Agnisola, C., Hamilton, N. M. and Trara Genoino, I.** Oxygen consumption of the isolated heart of *Octopus*: effects of power output and hypoxia 131, 137
- Howes, E. A.** See SMITH, HOWES and TREHERNE
- Hughes, George M.** See DUTHIE and HUGHES
- Hyde, D. A. and Perry, S. F.** Acid–base and ionic regulation in the American eel (*Anguilla rostrata*) during and after prolonged aerial exposure: branchial and renal adjustments 133, 429
- Ierusalimsky, Victor N. and Balaban, Pavel M.** Functioning of identified snail neurones in electric fields 131, 17
- Ingermann, Rolf L. and Virgin, Garth L.** Glycogen content and release of glucose from red blood cells of the sipunculan worm *Themiste dyscrita* 129, 141
- Ishimatsu, Atsushi.** See HICKS, ISHIMATSU and HEISLER
- Itoh, Hirokazu.** See NAKAOKA, KUROTANI and ITOH
- Iwama, George K.** See CAMERON and IWAMA

- Jensen, Frank B. and Weber, Roy E.** Internal hypoxia-hypercapnia in tench exposed to aluminium in acid water: effects on blood gas transport, acid-base status and electrolyte composition in arterial blood 127, 427
- Johansen, Jørgen and Kleinhaus, Anna L.** Saxitoxin differentiates between two types of Na<sup>+</sup>-dependent potentials in the Retzius cell of hirudinid leeches 131, 351
- Johansen, K., Abe, A. S. and Andresen, J. H.** Intracardiac shunting revealed by angiocardiology in the lizard *Tupinambis teguixin* 130, 1
- Johansen, Kjell.** See ABE and JOHANSEN
- Johnston, Ian A.** Respiratory characteristics of muscle fibres in a fish (*Chaenocephalus aceratus*) that lacks haem pigments 133, 415  
—See also MUTUNGI and JOHNSTON
- Jones, David R.** See GABBOTT and JONES  
—See also FURILLA and JONES
- Joos, Barbara.** Carbohydrate use in the flight muscles of *Manduca sexta* during pre-flight warm-up 133, 317
- Josephson, Robert K. and Stokes, Darrell R.** The contractile properties of a crab respiratory muscle 131, 265
- Jungers, W. L.** See ANAPOL and JUNGERS
- Kahan, Linda B.** See MOFFETT, YOX, KAHAN and RIDGWAY
- Kammer, Ann E.** See RHEUBEN and KAMMER
- Karlsen, Hans Erik and Sand, Olav.** Selective and reversible blocking of the lateral line in freshwater fish 133, 249
- Katahira, E. J.** See BOLLENBACHER, GRANGER, KATAHIRA and O'BRIEN
- Kavanagh, Mark W.** The efficiency of sound production in two cricket species, *Gryllotalpa australis* and *Teleogryllus commodus* (Orthoptera: Grylloidea) 130, 107
- Kerry, C. J., Ramsey, R. L., Sansom, M. S. P., Usherwood, P. N. R. and Washio, H.** Single-channel studies of the action of (+)-tubocurarine on locust muscle glutamate receptors 127, 121
- Kinugawa, Kohsaku.** See NAKAOKA, KINUGAWA and KUROTANI
- Kirshner, David S.** See WRIGHT and KIRSHNER
- Kleinhaus, Anna L.** See JOHANSEN and KLEINHAUS
- Kobayashi, Makoto.** See FURUKAWA and KOBAYASHI
- Koch, Alan and Moffett, David F.** Kinetics of extracellular solute movement in the isolated midgut of tobacco hornworm (*Manduca sexta*) 133, 199
- Koch, U. T.** See WEILAND and KOCH
- Koch, Uwe T.** See SCHÄFFNER and KOCH
- Konishi, Masakazu.** See COLES, KONISHI and PETTIGREW
- Kornhuber, M. E. and Walther, C.** The electrical constants of the fibres from two leg muscles of the locust *Schistocerca gregaria* 127, 173
- Kowalski, Ute and Wiltschko, Roswitha.** Pigeon homing: familiarity with the release site reduces the release site bias 133, 457
- Kramer, Bernd.** The sexually dimorphic jamming avoidance response in the electric fish *Eigenmannia* (Teleostei, Gymnotiformes) 130, 39
- Krüppel, T.** See LUEKEN, KRÜPPEL and GAERTNER
- Kuffler, Damien P.** Long-distance regulation of regenerating frog axons 132, 151
- Kurotani, Tohru.** See NAKAOKA, KINUGAWA and KUROTANI  
—See also NAKAOKA, KUROTANI and ITOH
- Lahlou, B.** See GIBSON, ELLORY and LAHLOU
- Leatherland, J. F.** See FARBRIDGE and LEATHERLAND
- Lees, G.** See SHIMAHARA, PICHON, LEES, BEADLE and BEADLE
- Lehman, H. K. and Greenberg, M. J.** The actions of FMRFamide-like peptides on visceral and somatic muscles of the snail *Helix aspersa* 131, 55
- Lehman, H. K. and Price, D. A.** Localization of FMRFamide-like peptides in the snail *Helix aspersa* 131, 37
- Lent, Charles M. and Dickinson, Michael H.** On the termination of ingestive behaviour by the medicinal leech 131, 1
- Libersat, F.** See CLARAC, LIBERSAT, PFLÜGER and RATHMAYER
- Lieberman, Edward M.** See ORR and LIEBERMAN
- Lignon, J. M.** Ionic permeabilities of the isolated gill cuticle of the shore crab *Carcinus maenas* 131, 159
- Love, J. B.** See BAUDINETTE, GANNON, RUNCIMAN, WELLS and LOVE
- Lowell, William R.** See GRAHAM, LOWELL, RUBINOFF and MOTTA

- Lueken, W., Krüppel, T. and Gaertner, M.** Effects of raised  $[K^+]_o$  and  $[Ca^{2+}]_o$  on conjugation and on electrophysiological parameters in the marine ciliate *Euplotes vannus* **130**, 193
- Lukowiak, K.** See GOLDBERG, COLMERS, EDSTROM and LUKOWIAK
- Lutcavage, M. E., Lutz, P. L. and Baier, H.** Gas exchange in the loggerhead sea turtle *Caretta caretta* **131**, 365
- Lutz, P. L.** See LUTCAVAGE, LUTZ and BAIER
- Lutz, Peter.** See FEBRY and LUTZ
- McFarlane, I. D., Graff, D. and Grimmelikhuijzen, C. J. P.** Excitatory actions of Antho-RFamide, an anthozoan neuropeptide, on muscles and conducting systems in the sea anemone *Callactis parasitica* **133**, 157
- McGlade-McCulloh, E.** See MULLER, MCGLADE-MCCULLOH and MASON
- McKay, M. Craig.** See ANDERSON and MCKAY
- McMahan, U. J.** See SMITH, YAO, REIST, MAGILL, WALLACE and MCMAHAN
- McMahon, B. R.** See BARNHART and MCMAHON
- McMahon, Brian R. and Burggren, Warren W.** Respiratory physiology of air breathing in the teleost fish *Misgurnus anguillicaudatus* **133**, 371
- Magill, Catherine.** See SMITH, YAO, REIST, MAGILL, WALLACE and MCMAHAN
- Marden, James H.** Maximum lift production during takeoff in flying animals **130**, 235
- Maronde, Ulrike.** See HERTEL and MARONDE  
—See also HERTEL, SCHÄFER and MARONDE
- Mason, A.** See MULLER, MCGLADE-MCCULLOH and MASON
- Mense, D. C.** See TUFTS, MENSE and RANDALL
- Meyermann, R.** See WEKERLE, SUN, OROPEZA-WEKERLE and MEYERMANN
- Miller, Kirk, Packard, Gary C. and Packard, Mary J.** Hydric conditions during incubation influence locomotor performance of hatchling snapping turtles **127**, 401
- Miller, Robert H.** See RAFF, FRENCH-CONSTANT and MILLER
- Milligan, C. Louise and Wood, Chris M.** Regulation of blood oxygen transport and red cell pH; after exhaustive activity in rainbow trout (*Salmo gairdneri*) and starry flounder (*Platichthys stellatus*) **133**, 263
- Milsom, William K.** See SHADWICK, GOSLINE and MILSOM
- Misko, Thomas P., Radeke, Monte J. and Shooter, Eric M.** Nerve growth factor in neuronal development and maintenance **132**, 177
- Mizunami, Makoto, Yamashita, Shigeki and Tateda, Hideki.** Calcium-dependent action potentials in the second-order neurones of cockroach ocelli **130**, 259
- Moffett, David F.** See KOCH and MOFFETT
- Moffett, Stacia, Yox, Daniel P., Kahan, Linda B. and Ridgway, Richard L.** Innervation of the anterior and posterior levator muscles of the fifth leg of the crab *Carcinus maenas* **127**, 229
- Morgan, Kenneth R.** Temperature regulation, energy metabolism and mate-searching in rain beetles (*Pleocomma* spp.) winter-active, endothermic scarabs (Coleoptera) **128**, 107
- Morgan, Kenneth R. and Heinrich, Bernd.** Temperature regulation in bee- and wasp-mimicking syrphid flies **133**, 59
- Morris, Catherine E.** See SIGURDSON, MORRIS, BREZDEN and GARDNER
- Morris, S., Bridges, C. R. and Grieshaber, M. K.** The regulation of haemocyanin oxygen affinity during emersion of the crayfish *Austropotamobius pallipes*. III. The dependence of  $Ca^{2+}$ -haemocyanin binding on the concentration of L-lactate **133**, 339
- Motta, Jorge.** See GRAHAM, LOWELL, RUBINOFF and MOTTA
- Moyes, Christopher D.** See BALLANTYNE and MOYES
- Muller, K. J., McGlade-McCulloh, E. and Mason, A.** Tinkering with successful synapse regeneration in the leech: adding insult to injury **132**, 207
- Murdock, Larry L.** See EDGECOMB, MURDOCK, SMITH and STEPHEN  
—See also SUDLOW, EDGECOMB and MURDOCK
- Mushkot, Robert A.** See STIFFLER, RYAN and MUSHKOT

- Mutungi, Gabriel and Johnston, Ian A.** The effects of temperature and pH on the contractile properties of skinned muscle fibres from the terrapin, *Pseudemys scripta elegans* **128**, 87
- Nakaoka, Yasuo, Kinugawa, Kohsaku and Kurotani, Tohru.** Ca<sup>2+</sup>-dependent photoreceptor potential in *Paramecium bursaria* **131**, 107
- Nakaoka, Yasuo, Kurotani, Tohru and Itoh, Hirokazu.** Ionic mechanism of thermoreception in *Paramecium* **127**, 95
- Neil, Douglas M.** See NEWLAND and NEIL
- Newland, Philip L. and Neil, Douglas M.** Statocyst control of uropod righting reactions in different planes of body tilt in the Norway lobster, *Nephrops norvegicus* **131**, 301
- Nicholls, John G.** See CHIQUET and NICHOLLS
- Nikinmaa, M.** See TUFTS, NIKINMAA, STEFFENSEN and RANDALL
- Noble-Nesbitt, John and Al-Shukur, Marwan.** Effects of desiccation, water-stress and decapitation on integumentary water loss in the cockroach, *Periplaneta americana* **131**, 289
- O'Brien, M. A.** See BOLLENBACHER, GRANGER, KATAHIRA and O'BRIEN
- Oropeza-Wekerle, R. L.** See WEKERLE, SUN, OROPEZA-WEKERLE and MEYERMANN
- Orr, Liston A. and Lieberman, Edward M.** Studies of the cardiac-like action potential in crayfish giant axons induced by platinized tungsten metal electrodes **128**, 1
- Packard, Gary C.** See MILLER, PACKARD and PACKARD
- Packard, Mary J.** See MILLER, PACKARD and PACKARD
- Parnas, I.** Strengthening of synaptic inputs after elimination of a single neurone innervating the same target **132**, 231
- Pennycuik, C. J.** Flight of auks (Alcidae) and other northern seabirds compared with southern Procellariiformes: ornithodolite observations **128**, 335
- Perry, S. F.** See HYDE and PERRY  
—See also VERMETTE and PERRY
- Perry, S. F. and Vermette, M. G.** The effects of prolonged epinephrine infusion on the physiology of the rainbow trout, *Salmo gairdneri*. I. Blood respiratory, acid-base and ionic states **128**, 235
- Pettigrew, John D.** See COLES, KONISHI and PETTIGREW
- Pfau, Hans K.** Critical comments on a 'novel mechanical model of dipteran flight' (Miyan & Ewing, 1985) **128**, 463
- Pflüger, H. J.** See CLARAC, LIBERSAT, PFLÜGER and RATHMAYER
- Phillips, John B.** Laboratory studies of homing orientation in the eastern red-spotted newt, *Notophthalmus viridescens* **131**, 215
- Pichon, Y.** See SHIMAHARA, PICHON, LEES, BEADLE and BEADLE
- Pires, Anthony.** See DOHERTY and PIRES
- Pörtner, Hans-Otto.** Contributions of anaerobic metabolism to pH regulation in animal tissues: theory **131**, 69  
—Anaerobic metabolism and changes in the acid-base status: quantitative interrelationships and pH regulation in the marine worm *Sipunculus nudus* **131**, 89
- Price, D. A.** See LEHMAN and PRICE
- Radeke, Monte J.** See MISKO, RADEKE and SHOOTER
- Raff, Martin C., French-Constant, Charles and Miller, Robert H.** Glial cells in the rat optic nerve and some thoughts on remyelination in the mammalian CNS **132**, 35
- Ramsey, R. L.** See ASHFORD, BODEN, RAMSEY, SHINOZAKI and USHERWOOD  
—See also KERRY, RAMSEY, SANSOM, USHERWOOD and WASHIO
- Randall, D. J.** See STEFFENSEN, TUFTS and RANDALL  
—See also TUFTS, MENSE and RANDALL  
—See also TUFTS, NIKINMAA, STEFFENSEN and RANDALL
- Rathmayer, W.** See CLARAC, LIBERSAT, PFLÜGER and RATHMAYER
- Rees, B. B. and Stephenson, D. G.** Thermal dependence of maximum Ca<sup>2+</sup>-activated force in skinned muscle fibres of the toad *Bufo marinus* acclimated at different temperatures **129**, 309
- Reist, Noreen E.** See SMITH, YAO, REIST, MAGILL, WALLACE and MCMAHAN



- Rheuben, Mary B. and Kammer, Ann E.**  
Structure and innervation of the third axillary muscle of *Manduca* relative to its role in turning flight 131, 373
- Riddiford, Lynn M.** See WOLFGANG and RIDDIFORD
- Ridgway, Richard L.** See MOFFETT, YOX, KAHAN and RIDGWAY
- Rubinoff, Ira.** See GRAHAM, LOWELL, RUBINOFF and MOTTA
- Runciman, W. B.** See BAUDINETTE, GANNON, RUNCIMAN, WELLS and LOVE
- Ryan, Sandra L.** See STIFFLER, RYAN and MUSHKOT
- Sand, Olav.** See KARLSEN and SAND
- Sansom, M. S. P.** See KERRY, RAMSEY, SANSOM, USHERWOOD and WASHIO
- Sattelle, David B.** See BLAGBURN and SATTELLE
- Schäfer, Sabine.** See HERTEL, SCHÄFER and MARONDE
- Schäffner, Karl-Heinz and Koch, Uwe T.**  
A new field of wing campaniform sensilla essential for the production of the attractive calling song in crickets 129, 1  
—Effects of wing campaniform sensilla lesions on stridulation in crickets 129, 25
- Schluger, James H. and Hopkins, Carl D.**  
Electric fish approach stationary signal sources by following electric current lines 130, 359
- Schmidt, J. M. and Smith, J. J. B.**  
Measurement of host curvature by the parasitoid wasp *Trichogramma minutum*, and its effect on host examination and progeny allocation 129, 151
- Sears, T. A.** Structural changes in intercostal motoneurons following axotomy 132, 93
- Secomb, Timothy W.** See WRIGHT, SECOMB and BRADLEY
- Seeley, Thomas D.** See DYER and SEELEY
- Shadwick, Robert E., Gosline, John M. and Milsom, William K.** Arterial haemodynamics in the cephalopod mollusc, *Octopus dofleini* 130, 87
- Shimahara, T., Pichon, Y., Lees, G., Beadle, C. A. and Beadle, D. J.**  
Gamma-aminobutyric acid receptors on cultured cockroach brain neurones 131, 231
- Shinozaki, H.** See ASHFORD, BODEN, RAMSEY, SHINOZAKI and USHERWOOD
- Shooter, Eric M.** See MISKO, RADEKE and SHOOTER
- Shultz, Jeffrey W.** Walking and surface film locomotion in terrestrial and semi-aquatic spiders 128, 427
- Sidell, Bruce D. and Hazel, Jeffrey R.**  
Temperature affects the diffusion of small molecules through cytosol of fish muscle 129, 191
- Sigurdson, Wade J., Morris, Catherine E., Brezden, Borys L. and Gardner, David R.** Stretch activation of a  $K^+$  channel in molluscan heart cells 127, 191
- Sillar, Keith T., Clarac, François and Bush, Brian M. H.** Intersegmental coordination of central neural oscillators for rhythmic movements of the walking legs in crayfish, *Pacifastacus leniusculus* 131, 245
- Simpson, S. J.** See ABISGOLD and SIMPSON
- Smith, André B.** See EDGEComb, MURDOCK, SMITH and STEPHEN
- Smith, J. J. B.** See SCHMIDT and SMITH
- Smith, Martin A., Yao, Yung-mae M., Reist, Noreen E., Magill, Catherine, Wallace, Bruce G. and McMahan, U. J.** Identification of agrin in electric organ extracts and localization of agrin-like molecules in muscle and central nervous system 132, 223
- Smith, P. J. S.** See WELLS, HOULIHAN, DUTHIE, SMITH and WELLS
- Smith, P. J. S. and Hill, R. B.** Modulation of output from an isolated gastropod heart: effects of acetylcholine and FMRFamide 127, 105
- Smith, P. J. S., Howes, E. A. and Treherne, J. E.** Mechanisms of glial regeneration in an insect central nervous system 132, 59
- Soileau, L. C.** See THOMPSON, SOILEAU, BALICE-GORDON and SUTTON
- Spedding, G. R.** The wake of a kestrel (*Falco tinnunculus*) in gliding flight 127, 45  
—The wake of a kestrel (*Falco tinnunculus*) in flapping flight 127, 59
- Spira, Micha E., Zeldes, Daniel, Hochner, Binyamin and Dormann, Ada.** The effects of microenvironment on the redifferentiation of regenerating neurones: neurite architecture, acetylcholine receptors and  $Ca^{2+}$  channel distribution 132, 111

- Spring, Jeffrey H. and Hazelton, Shelia R.** Excretion in the house cricket (*Acheta domestica*): stimulation of diuresis by tissue homogenates **129**, 63
- Steffensen, J. F.** See TUFTS, NIKINMAA, STEFFENSEN and RANDALL
- Steffensen, J. F., Tufts, B. L. and Randall, D. J.** Effect of burst swimming and adrenaline infusion on O<sub>2</sub> consumption and CO<sub>2</sub> excretion in rainbow trout, *Salmo gairdneri* **131**, 427
- Stephen, Margaret D.** See EDGEComb, MURDOCK, SMITH and STEPHEN
- Stephenson, D. G.** See REES and STEPHENSON
- Stiffler, Daniel F., Ryan, Sandra L. and Mushkot, Robert A.** Interactions between acid-base balance and cutaneous ion transport in larval *Ambystoma tigrinum* (Amphibia: Caudata) in response to hypercapnia **130**, 389
- Stöckmann, Wieland.** See GRAHAM, BAIRD and STÖCKMANN
- Stokes, Darrell R.** See JOSEPHSON and STOKES
- Straka, H.** See ZETTLER and STRAKA
- Sudlow, Leland C., Edgcomb, Robert S. and Murdock, Larry L.** Regulation of labellar and tarsal taste thresholds in the black blowfly, *Phormia regina* **130**, 219
- Sun, D.** See WEKERLE, SUN, OROPEZA-WEKERLE and MEYERMANN
- Susswein, Abraham J., Achituv, Yair, Cappell, Mitchell S. and Bennett, Michael V. L.** Pharyngeal movements during feeding sequences of *Navanax inermis* (Gastropoda: Opisthobranchia) in successive stages of dissection **128**, 323
- Sutton, L. A.** See THOMPSON, SOILEAU, BALICE-GORDON and SUTTON
- Takahata, Masakazu and Wine, Jeffrey J.** A local interneurone which receives differential input from the medial and lateral giant axons **129**, 385
- Tateda, Hideki.** See MIZUNAMI, YAMASHITA and TATEDA
- Taylor, E. W., Tyler-Jones, R. and Wheatly, M. G.** The effects of aerial exposure on the distribution of body water and ions in the freshwater crayfish *Austropotamobius pallipes* (Lereboullet) **128**, 307
- Taylor, Victoria A.** See YOUNG and TAYLOR
- Thompson, W. J., Soileau, L. C., Balice-Gordon, R. J. and Sutton, L. A.** Selective innervation of types of fibres in developing rat muscle **132**, 249
- Toh, Yoshihiro.** See YAMANA and TOH
- Toolson, Eric C. and Hadley, Neil F.** Energy-dependent facilitation of transcuticular water flux contributes to evaporative cooling in the Sonoran desert cicada, *Diceroprocta apache* (Homoptera: Cicadidae) **131**, 439
- Trara Genoino, I.** See HOULIHAN, AGNISOLA, HAMILTON and TRARA GENOINO
- Treherne, J. E.** See SMITH, HOWES and TREHERNE
- Tucker, Vance A.** Gliding birds: the effect of variable wing span **133**, 33
- Tufts, B. L.** See STEFFENSEN, TUFTS and RANDALL
- Tufts, B. L., Mense, D. C. and Randall, D. J.** The effects of forced activity on circulating catecholamines and pH and water content of erythrocytes in the toad **128**, 411
- Tufts, B. L., Nikinmaa, M., Steffensen, J. F. and Randall, D. J.** Ion exchange mechanisms on the erythrocyte membrane of the aquatic salamander, *Amphiuma tridactylum* **133**, 329
- Tyler-Jones, R.** See TAYLOR, TYLER-JONES and WHEATLY
- Usherwood, P. N. R.** See ASHFORD, BODEN, RAMSEY, SHINOZAKI and USHERWOOD—See also KERRY, RAMSEY, SANSOM, USHERWOOD and WASHIO
- Vermette, M. G.** See PERRY and VERMETTE

- Vermette, M. G. and Perry, S. F.** The effects of prolonged epinephrine infusion on the physiology of the rainbow trout, *Salmo gairdneri*. II. Branchial solute fluxes **128**, 255
- The effects of prolonged epinephrine infusion on the physiology of the rainbow trout, *Salmo gairdneri*. III. Renal ionic fluxes **128**, 269
- Vetter, Russell D.** See ARP, CHILDRESS and VETTER
- Vidal-Sanz, Manuel.** See BRAY, VILLEGAS-PÉREZ, VIDAL-SANZ and AGUAYO
- Villegas-Pérez, Maria Paz.** See BRAY, VILLEGAS-PÉREZ, VIDAL-SANZ and AGUAYO
- Virgin, Garth L.** See INGERMANN and VIRGIN
- Wallace, Bruce G.** See SMITH, YAO, REIST, MAGILL, WALLACE and MCMAHAN
- Walsh, Patrick J.** Lactate uptake by toadfish hepatocytes: passive diffusion is sufficient **130**, 295
- Walther, C.** See KORNUBER and WALTHER
- Washio, H.** See KERRY, RAMSEY, SANSOM, USHERWOOD and WASHIO
- Watson, R. Douglas, Williams, Tammy K. and Bollenbacher, Walter E.** Regulation of ecdysone biosynthesis in the tobacco hornworm, *Manduca sexta*: titre of the haemolymph stimulatory factor during the last larval instar **128**, 159
- Weber, Roy E.** See JENSEN and WEBER
- Weiland, G. and Koch, U. T.** Sensory feedback during active movements of stick insects **133**, 137
- Wekerle, H., Sun, D., Oropeza-Wekerle, R. L. and Meyermann, R.** Immune reactivity in the nervous system: modulation of T-lymphocyte activation of glial cells **132**, 43
- Wells, J.** See WELLS, DUTHIE, HOULIHAN, SMITH and WELLS
- Wells, M. J., Duthie, G. G., Houlihan, D. F., Smith, P. J. S. and Wells, J.** Blood flow and pressure changes in exercising octopuses (*Octopus vulgaris*) **131**, 175
- Wells, S.** See BAUDINETTE, GANNON, RUNCIMAN, WELLS and LOVE
- Wenning, Angela.** Salt and water regulation in *Macrobdella decora* (Hirudinea: Gnathobdelliformes) under osmotic stress **131**, 337
- Westerfield, Monte.** Substrate interactions affecting motor growth cone guidance during development and regeneration **132**, 161
- Wheatly, M. G.** See TAYLOR, TYLER-JONES and WHEATLY
- Wheatly, Michèle G. and Henry, Raymond P.** Branchial and antennal gland  $\text{Na}^+/\text{K}^+$ -dependent ATPase and carbonic anhydrase activity during salinity acclimation of the euryhaline crayfish *Pacifastacus leniusculus* **133**, 73
- Wigglesworth, V. B.** How does a fly cling to the under surface of a glass sheet? **129**, 373
- Williams, Tammy K.** See WATSON, WILLIAMS and BOLLENBACHER
- Wiltschko, Roswitha.** See KOWALSKI and WILTSCHKO
- Wine, J. J.** See DUMONT and WINE
- Wine, Jeffrey J.** See TAKAHATA and WINE
- Wolfgang, William J. and Riddiford, Lynn M.** Cuticular mechanics during larval development of the tobacco hornworm, *Manduca sexta* **128**, 19
- Wolowyk, M. W.** See ELLORY, WOLOWYK and YOUNG
- Wood, Chris M.** See MILLIGAN and WOOD
- Wright, Jonathan C. and Kirshner, David S.** Allometry of lung volume during voluntary submergence in the saltwater crocodile *Crocodylus porosus* **130**, 433
- Wright, Stephen H., Secomb, Timothy W. and Bradley, Timothy J.** Apical membrane permeability of *Mytilus* gill: influence of ultrastructure, salinity and competitive inhibitors on amino acid fluxes **129**, 205

**Yamana, Kenjiro and Toh, Yoshihiro.**

Intracellular recording from receptor cells of the temporal organ of the Japanese house centipede, *Thereuonema hilgendorfi*: receptor potential and conductance changes 131, 205

**Yamashita, Shigeki.** See MIZUNAMI, YAMASHITA and TATEDA**Yao, Yung-mae M.** See SMITH, YAO, REIST, MAGILL, WALLACE and MCMAHAN**Yee, Audrey, Burkhardt, James and Gilly, W. F.** Mobilization of a coordinated escape response by giant axons in the ophiuroid, *Ophiopteris papillosa* 128, 287**Young, J. D.** See ELLORY, WOLOWYK and YOUNG**Young, Stephen and Taylor, Victoria A.**

Spontaneous and evoked eye movements in *Polyphemus pediculus* (Cladocera: Crustacea): a case of open-loop tracking? 131, 323

**Yox, Daniel P.** See MOFFETT, YOX, KAHAN and RIDGWAY**Zeldes, Daniel.** See SPIRA, ZELDES, HOCHNER and DORMANN**Zettler, F. and Straka, H.** Synaptic chloride channels generating hyperpolarizing on-responses in monopolar neurones of the blowfly visual system 131, 435
